# Supplementary material
Source: PubMed Central journal article supplement (PMC1965515)

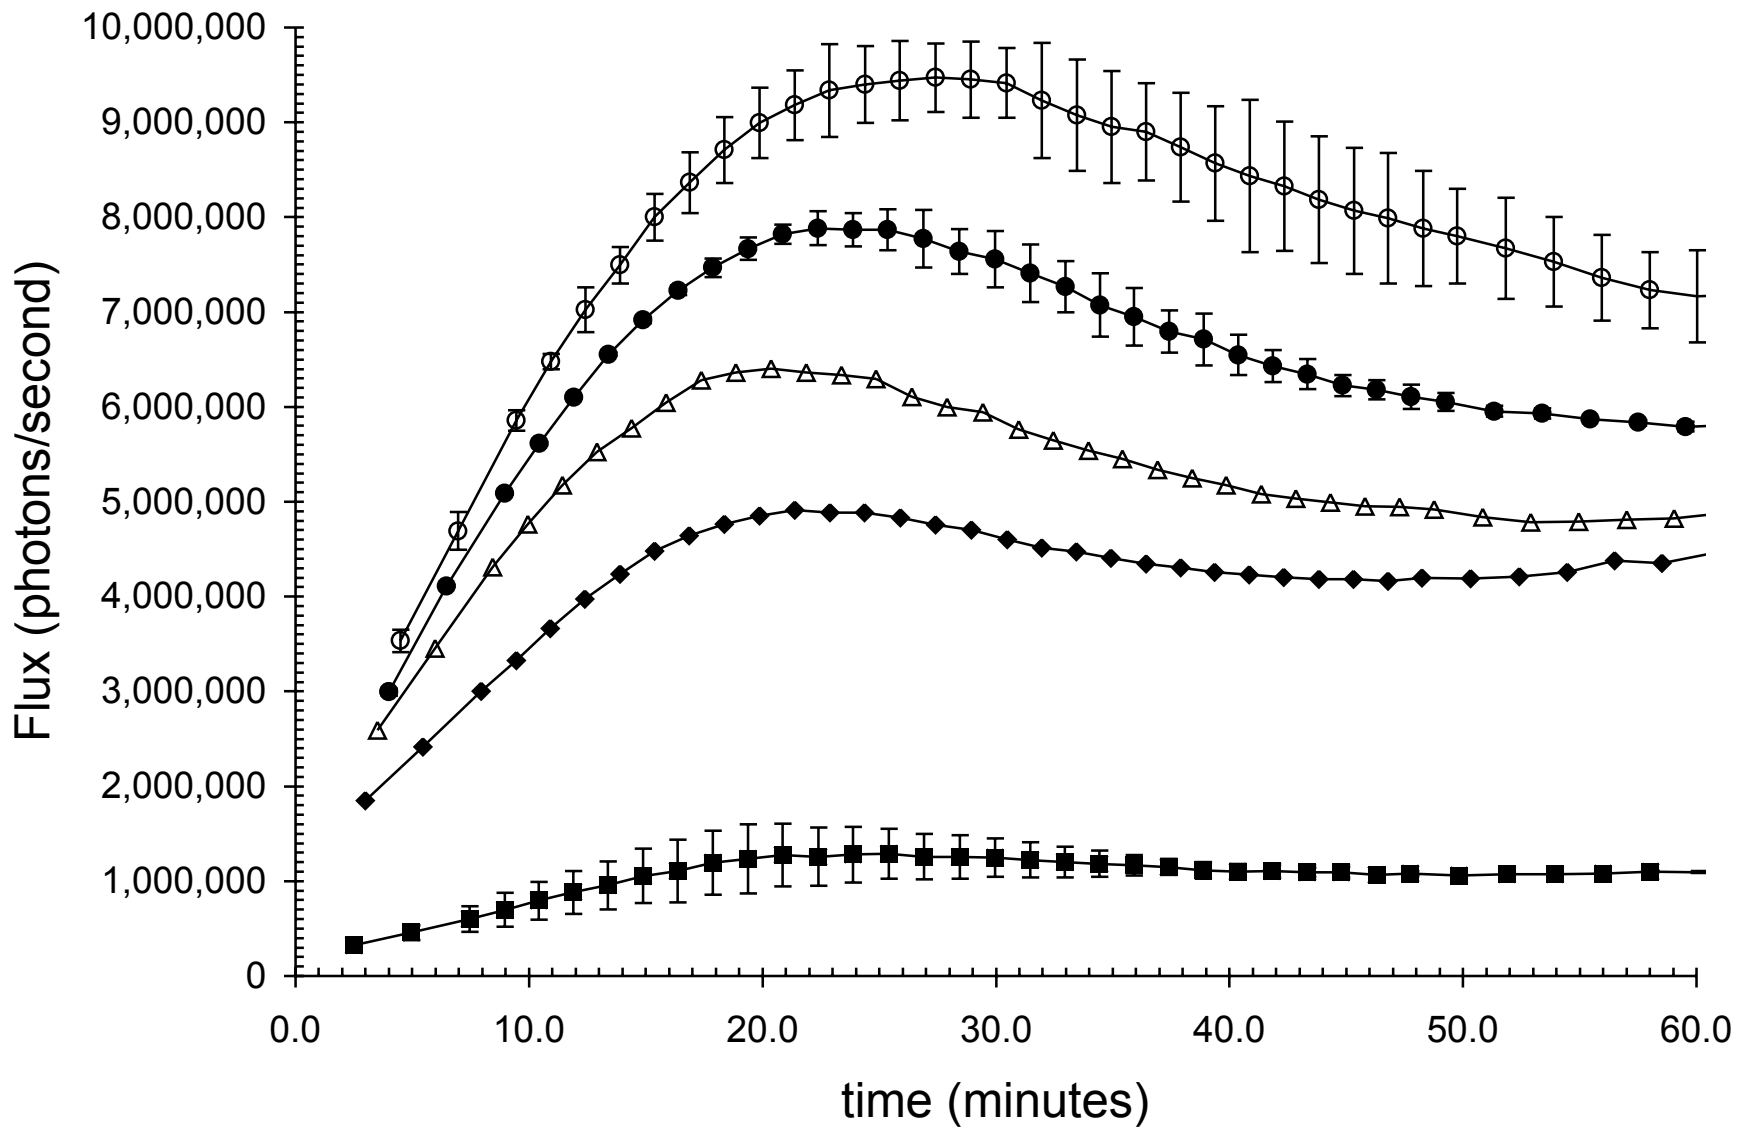

Supplement: pnas_0703919104_1.pdf [file pnas_0703919104_1.pdf]
